# Supplementary material for: Association of Circulating Heme Oxygenase-1, Lipid Profile and Coronary Disease Phenotype in Patients with Chronic Coronary Syndrome
Source: MDPI journal article supplement (doi:10.3390/antiox10122002), 2021-12-15
Supplement: s1 [file s1]

## Supplemental material

**Table S1. Effect of clinical variables on HO-1 plasma levels at univariate analysis**

|                                    | <b>coefficient</b> | <b>SE</b> | <b>P value</b> |
|------------------------------------|--------------------|-----------|----------------|
| <b>Demographics</b>                |                    |           |                |
| Age, years                         | -0.010             | 0.004     | 0.0218         |
| Males                              | 0.243              | 0.079     | 0.0022         |
| <b>Clinical characteristics</b>    |                    |           |                |
| Typical angina                     | -0.069             | 0.088     | ns             |
| LVEF%                              | -0.010             | 0.005     | 0.0286         |
| CAD probability                    | 0.002              | 0.002     | ns             |
| <b>Cardiovascular risk factors</b> |                    |           |                |
| Family history of CAD              | 0.013              | 0.082     | ns             |
| Diabetes                           | 0.121              | 0.082     | ns             |
| Hypercholesterolemia               | 0.032              | 0.80      | ns             |
| Hypertension                       | 0.030              | 0.083     | ns             |
| Smoking                            | 0.042              | 0.091     | ns             |
| BMI, kg/m <sup>2</sup>             | 0.025              | 0.009     | 0.0068         |
| Metabolic Syndrome                 | 0.133              | 0.082     | 0.1044         |
| <b>Pharmacological therapies</b>   |                    |           |                |
| Beta-blockers                      | 0.141              | 0.079     | 0.0748         |
| Calcium channel blockers           | 0.097              | 0.113     | ns             |
| ACE Inhibitors                     | -0.052             | 0.085     | ns             |
| ARBs                               | -0.33              | 0.104     | ns             |
| Diuretics                          | -0.061             | 0.104     | ns             |
| Anti-diabetic                      | 0.021              | 0.096     | ns             |

|                 |       |       |        |
|-----------------|-------|-------|--------|
| Statins         | 0.198 | 0.078 | 0.0108 |
| Aspirin         | 0.017 | 0.079 | ns     |
| Nitrates        | 0.249 | 0.124 | 0.0452 |
| Anti-coagulants | 0.391 | 0.272 | ns     |

**Table S2. Effect of bio-humoral variables on HO-1 plasma levels at univariate analysis**

| <b>Biomarkers</b>          | <b>coefficient</b> | <b>SE</b> | <b>P value</b> |
|----------------------------|--------------------|-----------|----------------|
| <b>Oxidative stress</b>    |                    |           |                |
| GGT, IU/L                  | 0.173              | 0.072     | 0.0159         |
| <b>Metabolic (glucose)</b> |                    |           |                |
| FPG, mg/dL                 | 0.073              | 0.150     | ns             |
| Insulin, $\mu$ UI/mL       | 0.019              | 0.059     | ns             |
| HOMA-IR index              | 0.044              | 0.068     | ns             |
| <b>Metabolic (lipid)</b>   |                    |           |                |
| Total-C, mg/dL             | -0.466             | 0.143     | 0.0012         |
| LDL-C, mg/dL               | -0.289             | 0.095     | 0.0026         |
| HDL-C, mg/dL               | -0.394             | 0.122     | 0.0013         |
| Remnant-C, mg/dL           | 0.002              | 0.003     | ns             |
| Non-HDL-C, mg/dL           | -0.002             | 0.001     | 0.0065         |
| Apo A1, mg/dL              | -0.054             | 0.154     | ns             |
| HDL-C/Apo A1               | -1.214             | 0.332     | 0.0003         |
| Apo B, mg/dL               | -0.278             | 0.113     | 0.0145         |
| Apo A1/Apo B               | 0.111              | 0.046     | 0.0163         |
| Lp (a)                     | -0.116             | 0.038     | 0.0024         |
| TG, mg/dL                  | 0.037              | 0.072     | ns             |
| TG/HDL-C                   | 0.020              | 0.016     | ns             |
| PCSK9, ng/mL               | -0.306             | 0.080     | 0.0002         |
| <b>Adipose Tissue</b>      |                    |           |                |
| Adiponectin, $\mu$ g/mL    | -0.186             | 0.061     | 0.0024         |
| Leptin, ng/mL              | 0.058              | 0.045     | ns             |

|                     |        |       |        |
|---------------------|--------|-------|--------|
| <b>Hepatic</b>      |        |       |        |
| AST, IU/L           | 0.053  | 0.108 | ns     |
| ALT, IU/L           | -0.005 | 0.081 | ns     |
| <b>Remodeling</b>   |        |       |        |
| MMP-2, ng/mL        | -0.035 | 0.092 | ns     |
| MMP-9, ng/mL        | -0.063 | 0.037 | 0.0876 |
| ALP, IU/L           | -0.284 | 0.108 | 0.0088 |
| <b>Inflammatory</b> |        |       |        |
| hs-CRP, mg/dL       | 0.195  | 0.122 | ns     |
| IL-6, ng/L          | 0.244  | 0.081 | 0.0027 |
| <b>Cardiac</b>      |        |       |        |
| hs-cTnT, ng/L       | 0.0001 | 0.059 | ns     |
| hs-cTnI, ng/L       | 0.093  | 0.027 | 0.0005 |
| NT-proBNP, ng/L     | 0.007  | 0.033 | ns     |
| <b>Renal</b>        |        |       |        |
| Creatinine, mg/dL   | 1.213  | 0.333 | 0.0003 |

**Figure S1. Distribution of independent predictors of HO-1 plasma levels (at multivariate analysis) according to HO-1 quartiles.**

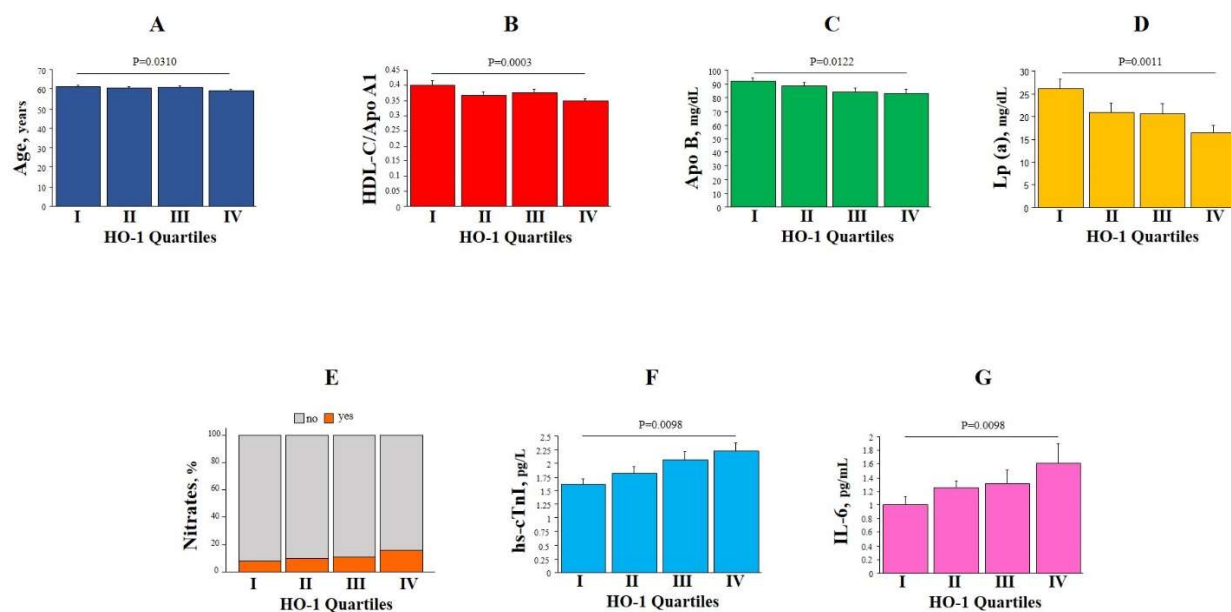

**Table S3. Clinical features of imaging population according to absence/presence of atherosclerosis, with or without ischemia.**

|                                  | <b>Imaging<br/>population<br/>n=347</b> | <b>Absent<br/>n=97</b> | <b>Atherosclerosis<br/>n=167</b> | <b>Atherosclerosis/<br/>Ischemia<br/>n=83</b> | <b>P<br/>value</b> |
|----------------------------------|-----------------------------------------|------------------------|----------------------------------|-----------------------------------------------|--------------------|
| <b>Demographics</b>              |                                         |                        |                                  |                                               |                    |
| Age, years                       | 60±9                                    | 55±8                   | 62±8                             | 63±8                                          | <0.0001            |
| Males                            | 211 (61)                                | 43 (44)                | 103 (62)                         | 65 (78)                                       | <0.0001            |
| <b>Clinical characteristics</b>  |                                         |                        |                                  |                                               |                    |
| Typical angina                   | 78 (22)                                 | 23 (24)                | 29 (17)                          | 26 (31)                                       | 0.0425             |
| LVEF%                            | 60±8                                    | 61±7                   | 61±8                             | 56±8                                          | <0.0001            |
| CAD probability                  | 47±19                                   | 39±18                  | 47±17                            | 56±21                                         | <0.0001            |
| <b>CVD risk factors</b>          |                                         |                        |                                  |                                               |                    |
| Family history of CAD            | 117 (34)                                | 40 (41)                | 64 (38)                          | 13 (16)                                       | 0.0003             |
| Diabetes                         | 103 (30)                                | 24 (25)                | 46 (27)                          | 33 (40)                                       | ns                 |
| Hypercholesterolemia             | 202 (58)                                | 50 (52)                | 103 (62)                         | 49 (59)                                       | ns                 |
| Hypertension                     | 210 (61)                                | 43 (44)                | 118 (71)                         | 49 (59)                                       | 0.0001             |
| Smoking                          | 82 (2421)                               | 20 (30)                | 42 (25)                          | 20 (27)                                       | ns                 |
| BMI, kg/m <sup>2</sup>           | 27.4±3.9                                | 26.9±3.9               | 27.4±3.8                         | 28.2±4.2                                      | ns                 |
| Metabolic Syndrome               | 125 (36)                                | 34 (35)                | 59 (35)                          | 32 (39)                                       | ns                 |
| <b>Pharmacological therapies</b> |                                         |                        |                                  |                                               |                    |
| Beta-blockers                    | 142 (41)                                | 32 (33)                | 69 (41)                          | 41 (49)                                       | ns                 |
| Calcium channel blockers         | 43 (12)                                 | 9 (9)                  | 18 (11)                          | 16 (19)                                       | ns                 |
| ACE Inhibitors                   | 96 (28)                                 | 19 (20)                | 51 (31)                          | 26 (31)                                       | ns                 |
| ARBs                             | 55 (16)                                 | 9 (9)                  | 34 (20)                          | 12 (15)                                       | ns                 |

|                 |          |         |         |         |        |
|-----------------|----------|---------|---------|---------|--------|
| Diuretics       | 59 (17)  | 13 (13) | 33 (20) | 13 (16) | ns     |
| Anti-diabetic   | 58 (17)  | 9 (9)   | 29 (17) | 20 (24) | 0.0280 |
| Statins         | 183 (53) | 37 (38) | 92 (55) | 54 (54) | 0.0011 |
| Aspirin         | 202 (58) | 42 (43) | 99 (59) | 61 (71) | 0.0002 |
| Nitrates        | 37 (11)  | 9 (6)   | 14 (8)  | 17 (20) | 0.0034 |
| Anti-coagulants | 7 (2)    | 2 (2)   | 2 (1)   | 3 (4)   | ns     |

**Table S4. Bio-humoral profile of imaging population according to absence/presence of atherosclerosis, with or without ischemia.**

|                            | <b>Imaging<br/>population<br/>n=347</b> | <b>Absent<br/>n=97</b> | <b>Atherosclerosis<br/>n=167</b> | <b>Atherosclerosis/<br/>Ischemia<br/>n=83</b> | <b>P<br/>value</b> |
|----------------------------|-----------------------------------------|------------------------|----------------------------------|-----------------------------------------------|--------------------|
| <b>Oxidative stress</b>    |                                         |                        |                                  |                                               |                    |
| HO-1, ng/mL                | 5.70±4.09                               | 5.16±3.67              | 5.57±4.01                        | 6.80±4.56                                     | 0.0314             |
| GGT, IU/L                  | 40±31                                   | 41±32                  | 37±19                            | 45±45                                         | ns                 |
| <b>Metabolic (glucose)</b> |                                         |                        |                                  |                                               |                    |
| FPG, mg/dL                 | 111±34                                  | 108±27                 | 110±37                           | 116±36                                        | ns                 |
| Insulin, $\mu$ UI/mL       | 11.5±11.3                               | 9.7±8.6                | 10.9±10.5                        | 14.5±14.8                                     | 0.0149             |
| HOMA-IR index              | 3.4±4.2                                 | 2.8±3.3                | 3.2±3.9                          | 4.4±5.3                                       | 0.0085             |
| <b>Metabolic (lipid)</b>   |                                         |                        |                                  |                                               |                    |
| Total-C, mg/dL             | 180±47                                  | 192±47                 | 178±48                           | 168±42                                        | 0.0053             |
| LDL-C, mg/dL               | 105±39                                  | 113±38                 | 104±41                           | 97±34                                         | 0.0376             |
| HDL-C, mg/dL               | 51±16                                   | 56±19                  | 51±14                            | 46±15                                         | <0.0001            |
| Remnant-C, mg/dL           | 24±15                                   | 23±12                  | 25±16                            | 24±15                                         | ns                 |
| Non-HDL-C, mg/dL           | 129±42                                  | 135±40                 | 128±43                           | 122±40                                        | ns                 |
| Apo A1, mg/dL              | 143±33                                  | 152±32                 | 141±33                           | 137±34                                        | 0.0057             |
| HDL-C/Apo A1               | 0.37±0.12                               | 0.37±0.11              | 0.38±0.14                        | 0.35±0.11                                     | ns                 |
| Apo B, mg/dL               | 87±27                                   | 88±23                  | 87±28                            | 85±29                                         | ns                 |
| Apo A1/Apo B               | 1.77±0.59                               | 1.82±0.58              | 1.75±0.54                        | 1.76±0.68                                     | ns                 |
| Lp (a)                     | 21±23                                   | 19±21                  | 22±25                            | 22±23                                         | ns                 |
| TG, mg/dL                  | 124±78                                  | 115±61                 | 125±80                           | 131±91                                        | ns                 |
| TG/HDL-C                   | 2.81±2.63                               | 2.39±1.93              | 2.72±2.17                        | 3.50±3.81                                     | 0.0153             |



|                       |           |           |           |           |         |
|-----------------------|-----------|-----------|-----------|-----------|---------|
| PCSK9, ng/mL          | 212±107   | 225±118   | 216±112   | 190±77    | ns      |
| <b>Adipose Tissue</b> |           |           |           |           |         |
| Adiponectin, µg/mL    | 9.2±6.2   | 9.2±5.3   | 9.2±6.4   | 9.3±6.7   | ns      |
| Leptin, ng/mL         | 10.1±10.8 | 12.3±12.5 | 9.6±10.8  | 8.3±8.1   | 0.0248  |
| <b>Hepatic</b>        |           |           |           |           |         |
| AST, IU/L             | 24±10     | 24±11     | 23±9      | 26±11     | 0.0393  |
| ALT, IU/L             | 21±13     | 22±17     | 20±11     | 22±11     | ns      |
| <b>Remodeling</b>     |           |           |           |           |         |
| MMP-2, ng/mL          | 160±60    | 154±60    | 160±61    | 167±58    | ns      |
| MMP-9, ng/mL          | 136±204   | 125±157   | 141±206   | 121±211   | ns      |
| ALP, IU/L             | 50±17     | 50±18     | 50±17     | 50±17     | ns      |
| <b>Inflammatory</b>   |           |           |           |           |         |
| hs-CRP, mg/dL         | 0.34±0.59 | 0.33±0.72 | 0.30±0.46 | 0.41±0.69 | ns      |
| IL-6, ng/L            | 1.04±1.14 | 0.82±0.90 | 1.06±1.22 | 1.27±1.39 | 0.0111  |
| <b>Cardiac</b>        |           |           |           |           |         |
| hs-cTnT, ng/L         | 8±6       | 6±4       | 8±5       | 9±8       | <0.0001 |
| hs-cTnI, ng/L         | 51±249    | 25±148    | 51±287    | 80±260    | <0.0001 |
| NT-proBNP, ng/L       | 115±166   | 71±67     | 109±160   | 178±230   | <0.0001 |
| <b>Renal</b>          |           |           |           |           |         |
| Creatinine, mg/dL     | 0.86±0.21 | 0.86±0.23 | 0.85±0.19 | 0.87±0.22 | ns      |
